# Supplementary material for: Mo2CTx MXene-based non-enzymatic electrochemical sensor for selective detection of hydrogen peroxide in colorectal cancer cells
Source: Royal Society of Chemistry journal article supplement (doi:10.1039/d6na00025h), 2026-05-19
Supplement: d6na00025h1.pdf [file d6na00025h1.pdf]

## **Supporting Information**

### **Mo<sub>2</sub>CT<sub>x</sub> MXene–Based Non-Enzymatic Electrochemical Sensor for Selective Detection of Hydrogen Peroxide in Colon Cancer Cells**

Shruthi Venkataraman<sup>1,#</sup>, Vasanth Magesh<sup>1</sup>, Chandramohan Govindasamy<sup>2</sup>, Raji Atchudan<sup>3,#</sup>,  
Sandeep Arya<sup>4</sup>, and Ashok K. Sundramoorthy<sup>\*,1</sup>

<sup>1</sup>Centre for Nano-Biosensors, Department of Prosthodontics and Materials Science, Saveetha  
Dental College and Hospitals, Saveetha Institute of Medical and Technical Sciences, India.

<sup>2</sup>Department of Community Health Sciences, College of Applied Medical Sciences, King  
Saud University, P.O. Box 10219, Riyadh 11433, Saudi Arabia.

<sup>3</sup>School of Chemical Engineering, Yeungnam University, Gyeongsan 38541, Republic of  
Korea.

<sup>4</sup>Department of Physics, University of Jammu, Jammu 180006, Jammu and Kashmir, India.

\* Corresponding author.

E-mail addresses: [ashok.sundramoorthy@gmail.com](mailto:ashok.sundramoorthy@gmail.com) (A.K. Sundramoorthy).

#These authors equally contributed.

## List of Supplementary Figures

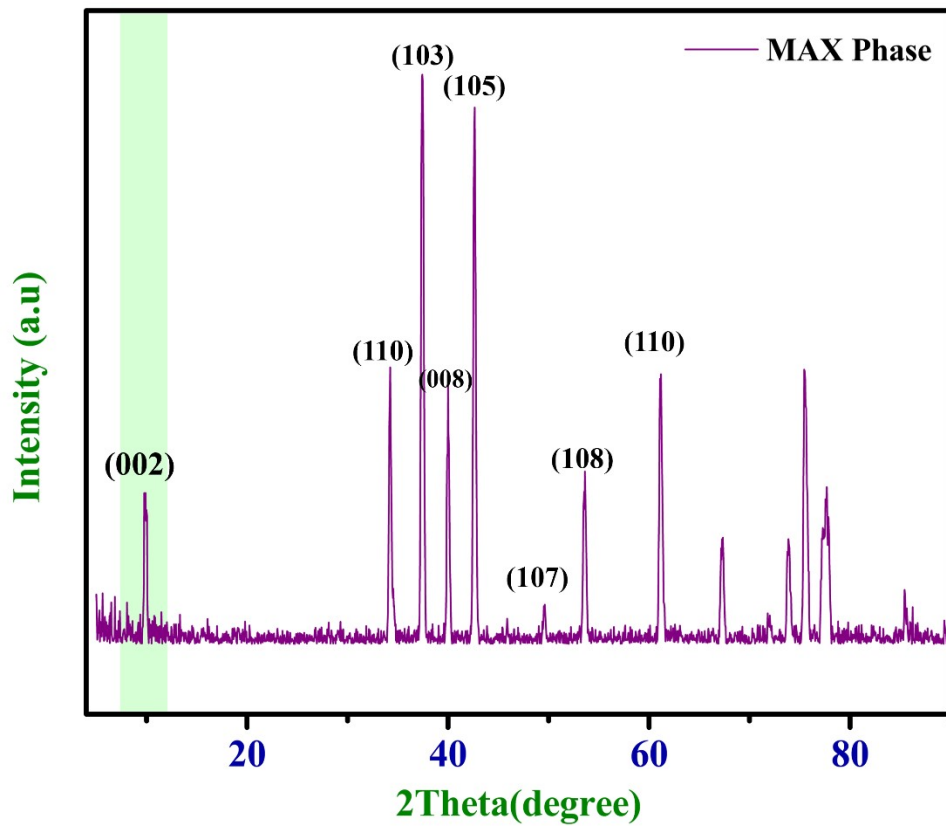

Figure S1. XRD data of Mo<sub>2</sub>Ga<sub>2</sub>C MAX phase.

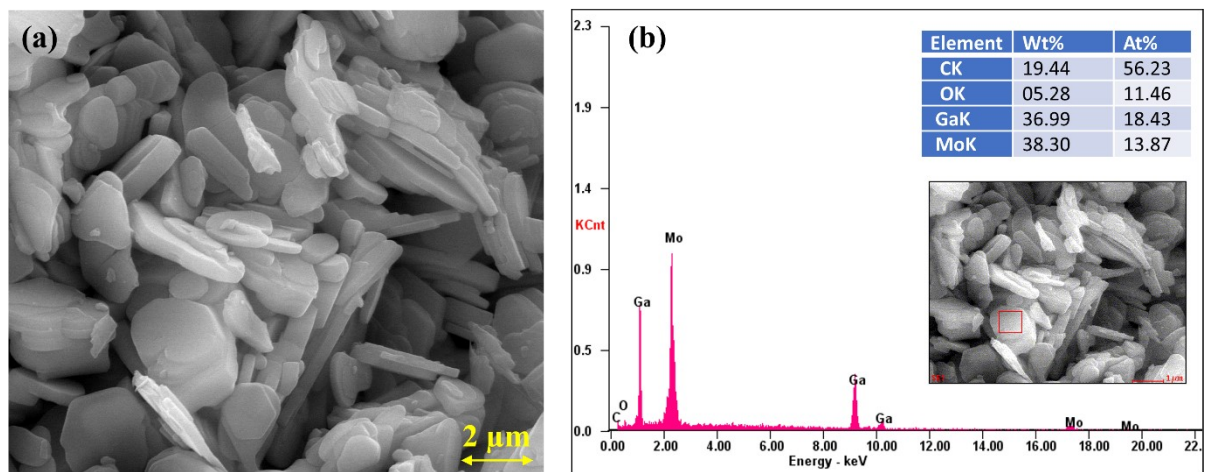

Figure S2. (a) SEM micrographs of Mo<sub>2</sub>Ga<sub>2</sub>C MAX phase precursor (Scale bar - 2 μm), (b) EDAX spectrum of Mo<sub>2</sub>Ga<sub>2</sub>C MAX phase. Inset: Table shows the list of elements and their wt% and at% along with SEM micrograph of Mo<sub>2</sub>Ga<sub>2</sub>C.

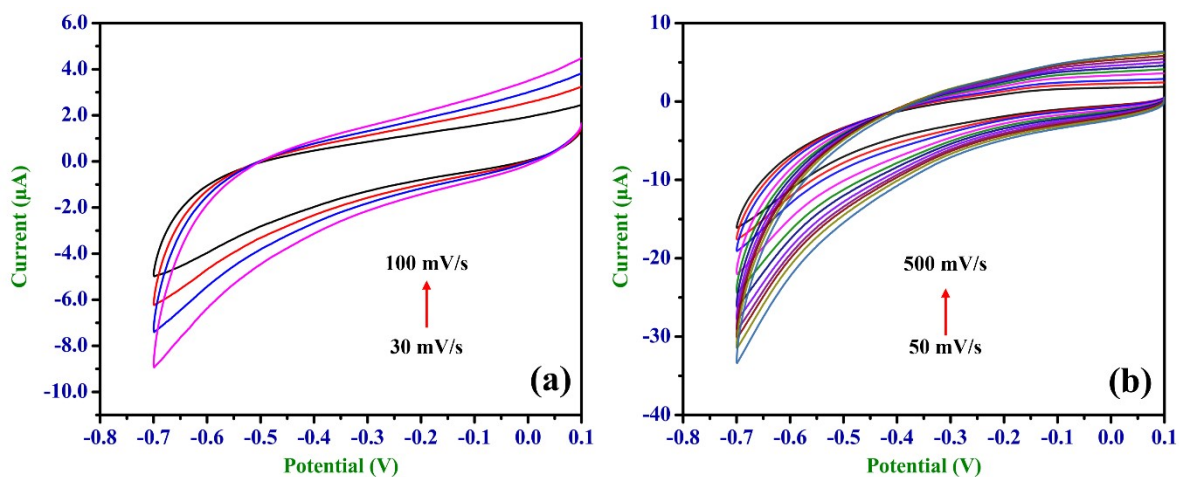

**Figure S3.** (a) CVs were recorded at different scan rates using an MX-GCE (without H<sub>2</sub>O<sub>2</sub>) in 0.1 M PBS (pH=7.4) from 30 mV/s to 100 mV/s. (b) CVs were recorded at different scan rates from 50 mV/s to 500 mV/s using an MX-GCE in 0.1 M PBS (pH=7.4) containing 284 mM H<sub>2</sub>O<sub>2</sub>.

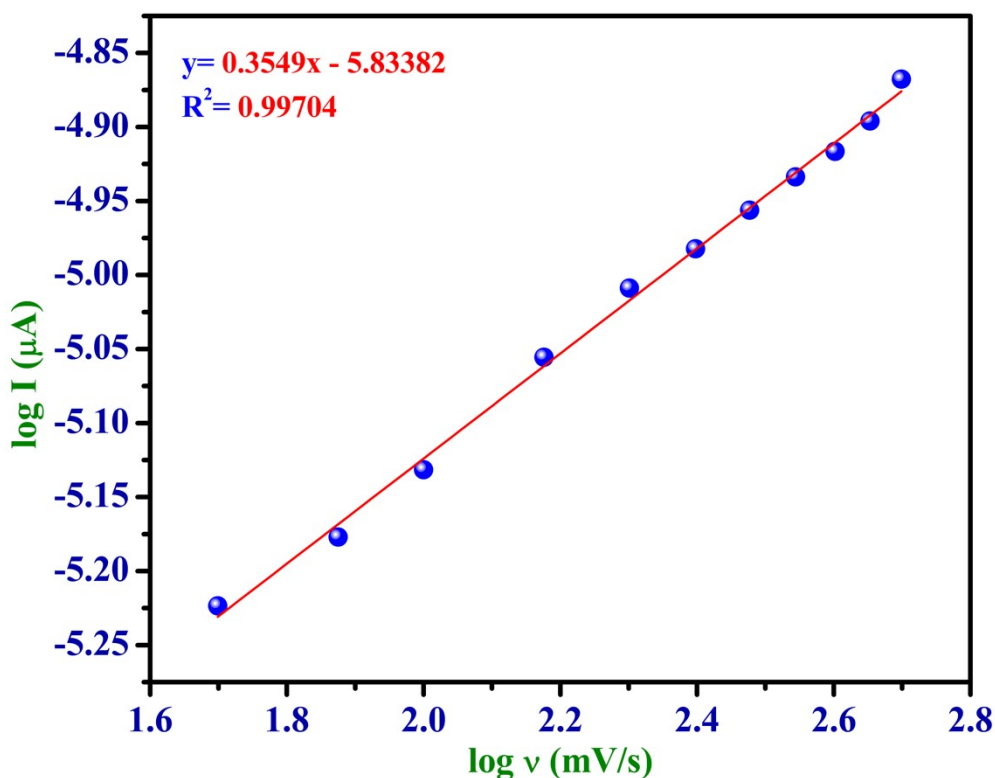

**Figure S4.** Linear plot of log I (µA) vs log v (mV/s) with different scan rates at a fixed potential of -0.45 V.

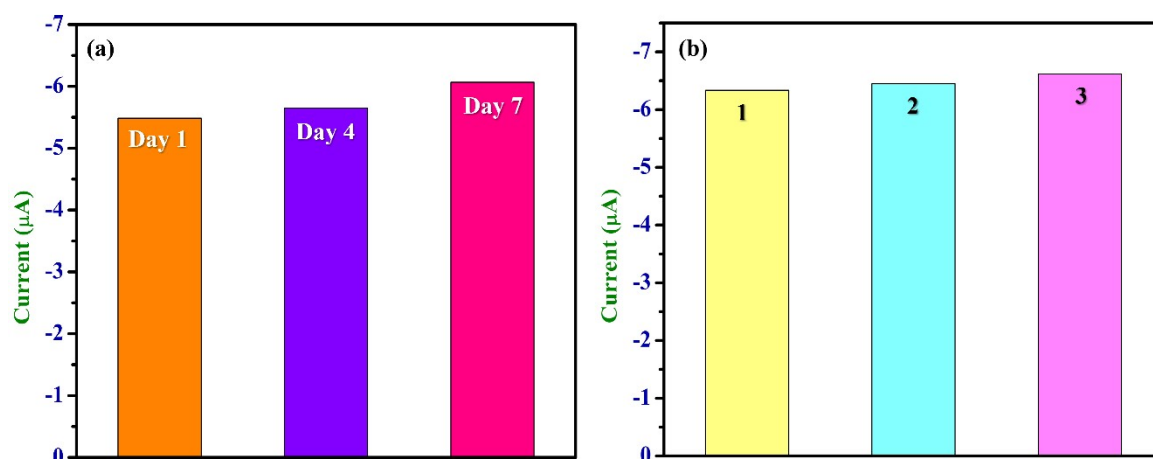

**Figure S5.** (a) CVs were recorded using MX-GCE in 0.1 M PBS (pH=7.4) at a scan rate of 50 mV/s on day 1, day 4, and day 7. (b) CVs were recorded using MX-GCE in 0.1 M PBS at a scan rate of 50 mV/s ( $n=3$ ) for intra-day stability measurements.

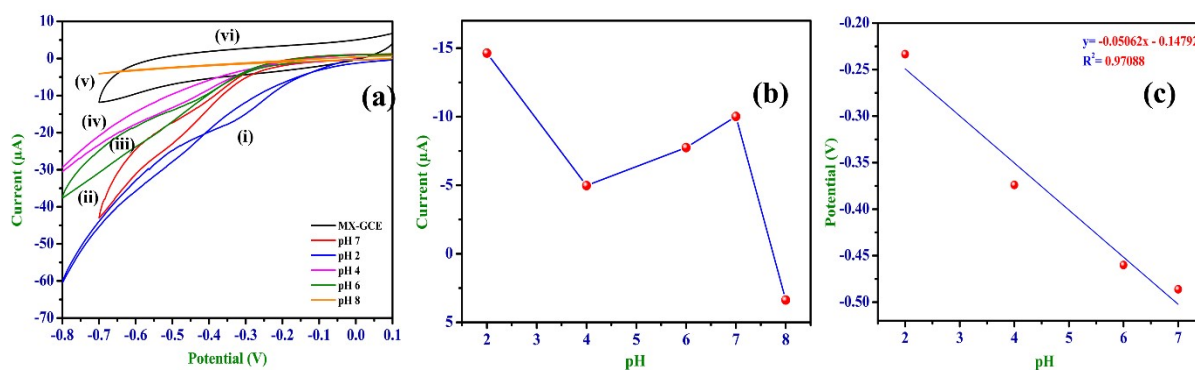

**Figure S6.** (a) CVs were recorded using a MX-GCE in the presence of 284 mM  $\text{H}_2\text{O}_2$  with various buffer solutions at different: pH = (i) 2, (ii) 7.4, (iii) 6, (iv) 4, (v) 8, in comparison with CVs recorded with MX-GCE in the absence of  $\text{H}_2\text{O}_2$  in 0.1 M PBS (pH = 7.4) at a scan rate of 50 mV/s. (b) Cathodic current response vs different pH in the presence of 284 mM  $\text{H}_2\text{O}_2$ . (c) A linear plot shows the corresponding  $\text{H}_2\text{O}_2$  reduction potential vs different pH in the presence of 284 mM  $\text{H}_2\text{O}_2$ .

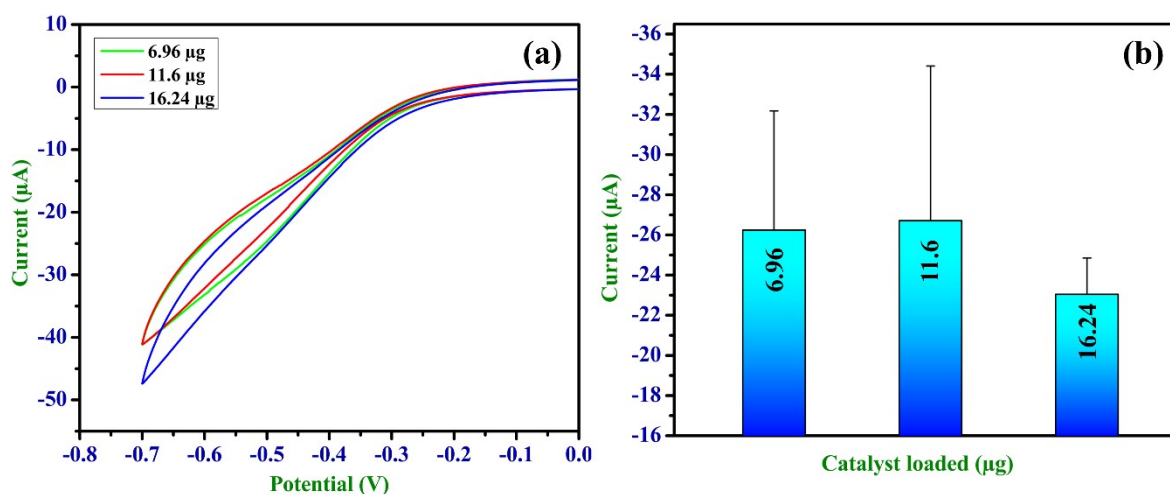

**Figure S7.** (a) CVs were recorded using an MX-GCE modified with different amount of catalyst (6.96, 11.6, 16.24 µg) in 0.1 M PBS (pH 7.4) in the presence of 284 mM H<sub>2</sub>O<sub>2</sub> at a scan rate of 50 mV/s. (b) Corresponding bar plot of cathodic current vs different catalyst concentrations in 0.1 M PBS (pH = 7.4) in the presence of 284 mM H<sub>2</sub>O<sub>2</sub> with standard deviation (SD) of  $5.94 \times 10^{-6}$ ,  $7.70 \times 10^{-6}$ ,  $1.81 \times 10^{-6}$  for 6.6 µg, 11.6 µg, and 16.2 µg, respectively.

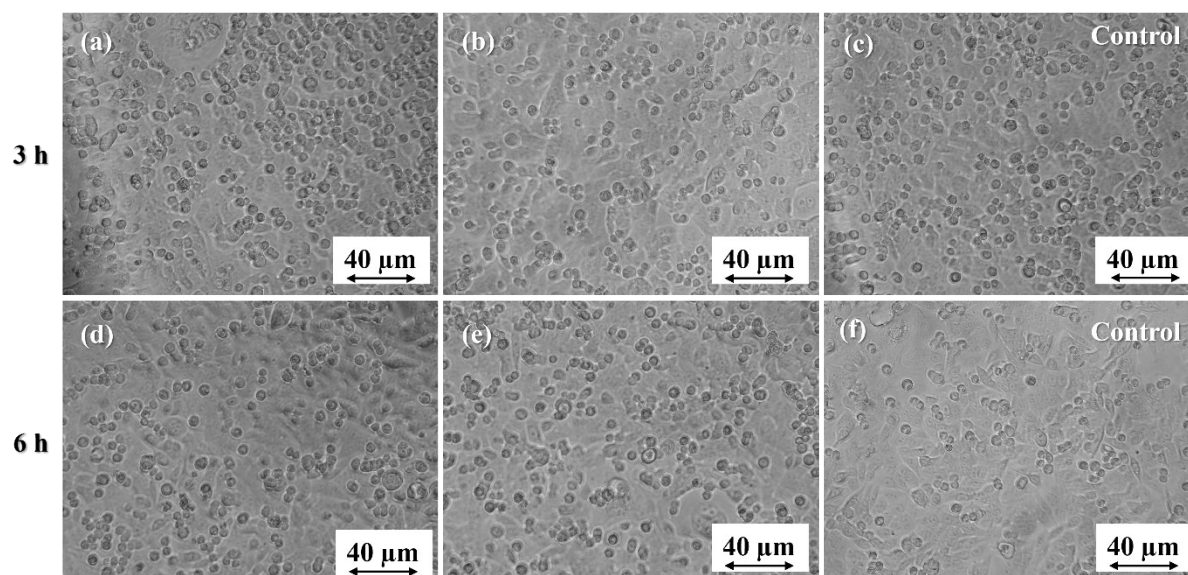

**Figure S8.** Phase contrast optical microscopy images of SW480 colorectal cancer cells following treatment with 0.5 mM ascorbic acid for 3 h at 37 °C, (a,b) different fields of view

from AA-treated SW480 cells for 3 h, (c) untreated controls (SW480 cells) without 0.5 mM AA for 3 h at 37 °C, (d, e) different fields of view from AA-treated SW480 cells for 6 h, and (e) untreated controls without 0.5 mM AA for 6 h at 37 °C.
